# Supplementary material for: A density functional theory study of two-dimensional bismuth selenite: layer-dependent electronic, transport and optical properties with spin–orbit coupling
Source: Royal Society of Chemistry journal article supplement (doi:10.1039/d4cp03782k), 2024-12-03
Supplement: d4cp03782k1.pdf [file d4cp03782k1.pdf]

**A density functional theory study of two-dimensional bismuth  
selenite: layer-dependent electronic, transport and optical properties  
with spin-orbit coupling†**

Yao Wang,<sup>1,2\*</sup> Jinsen Zhang,<sup>1\*</sup> Xuanlin Zhang,<sup>4</sup> Chenqiang Hua,<sup>3,a)</sup> Yunhao Lu,<sup>4</sup> and Xinyong  
Tao<sup>1</sup>

**AFFILIATIONS**

<sup>1</sup>College of Materials Science and Engineering, Zhejiang University of Technology, Hangzhou,  
310014, China

<sup>2</sup>Moganshan Research Institute at Deqing County Zhejiang University of Technology, Huzhou,  
313000, China

<sup>3</sup>Hangzhou International Innovation Institute, Beihang University, Hangzhou 311115, China

<sup>4</sup>School of Physics, Zhejiang University, Hangzhou 310027, China

\*These authors contributed equally to this work.

<sup>a)</sup> **Author to whom correspondence should be addressed:** [huachenqiang@buaa.edu.cn](mailto:huachenqiang@buaa.edu.cn).

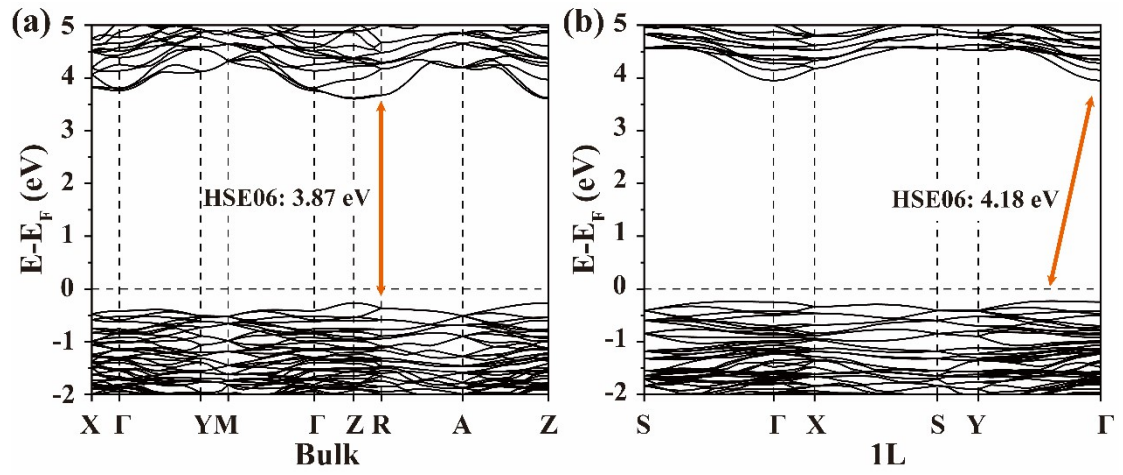

FIG. S1. Electronic structures of (a) bulk and (b) 1L  $\text{Bi}_2\text{SeO}_5$  calculated with HSE06 functional.

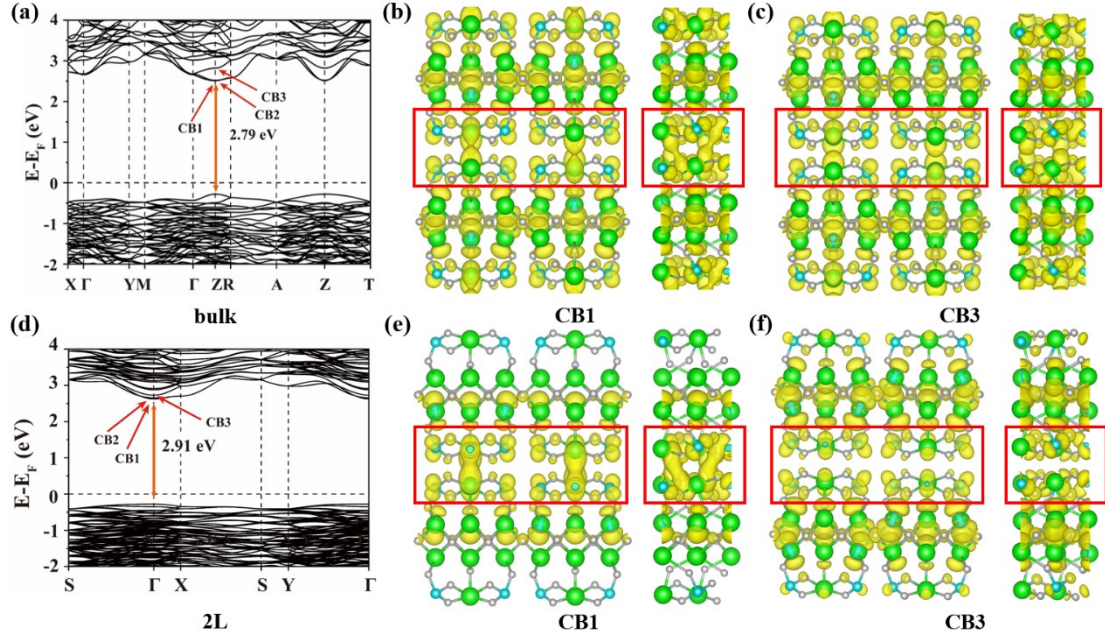

**FIG. S2.** (a, d) Electronic structures of bulk/2L  $\text{Bi}_2\text{SeO}_5$ . CB1, CB2 and CB3 are marked. Spatial distribution of wavefunction for the lowest CBs using an isosurface of  $0.0008 \text{ e}\text{\AA}^{-3}$  for bulk (b, c) and 2L (e, f)  $\text{Bi}_2\text{SeO}_5$ . For CB1, it is obvious to see that the interlayer charge distribution mimics the bonding-like behavior while antibonding-like for CB3. Besides, the perpendicular charge distribution always mixes some in-plane components, indicating the contribution of in-plane  $p$  orbitals.

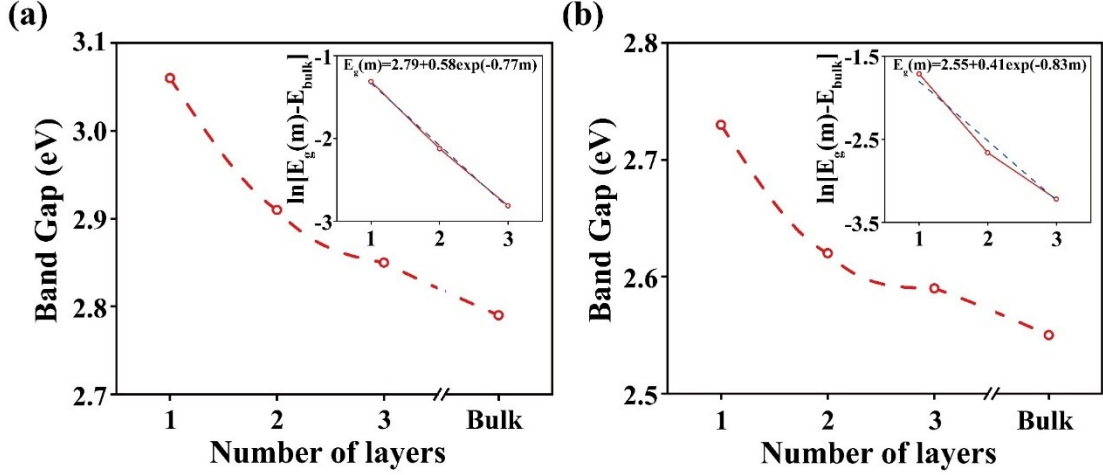

**FIG. S3.** The variation of bandgap  $E_g(m)$  as a function of layer number  $m$ . Inset: The blue dash line indicates the linear fitting. For (a), SOC is not considered while for (b), SOC is included.

**Note 1. The quantum confinement effect of 2D  $\text{Bi}_2\text{SeO}_5$ .**

To qualitatively explore the quantum confinement effect, we calculate the relationship between the bandgap ( $E_g$ ) and the layer number ( $m$ ). As shown in **Fig. S3-inset**, an obvious linear dependence between  $\ln[E_g(m)-E_g(\text{bulk})]$  and  $m$  can be observed. Such behavior indicates that  $E_g$  versus  $m$  follows the equation below,

$$E_g(m) = E(\text{bulk}) + \alpha \exp(-\beta m). \quad (1)$$

where  $\alpha$  and  $\beta$  are the characteristic parameters. The fitted curves are shown in **Fig. S3**, without considering SOC, the values of  $\alpha$  and  $\beta$  are 0.58 and 0.77, respectively. When SOC is taken into account, the values of  $\alpha$  and  $\beta$  are 0.41 and 0.83, respectively. This indicates that SOC plays a crucial role in the bandgap. With the above expression, it is convenient to predict the bandgap of multilayer  $\text{Bi}_2\text{SeO}_5$  without the detailed calculation, which can accelerate the selection of 2D  $\text{Bi}_2\text{SeO}_5$  with specific bandgap.

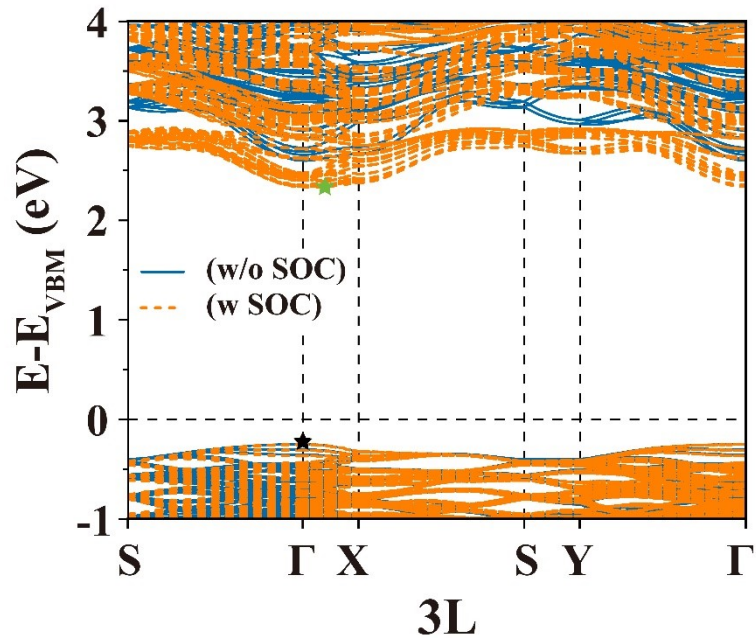

**FIG. S4.** Electronic band structure of 3L Bi<sub>2</sub>SeO<sub>5</sub> with SOC (orange dashed lines). For easy comparison, we plot the bands without SOC together (blue solid lines). Green and black pentagrams represent CBM and VBM, respectively.

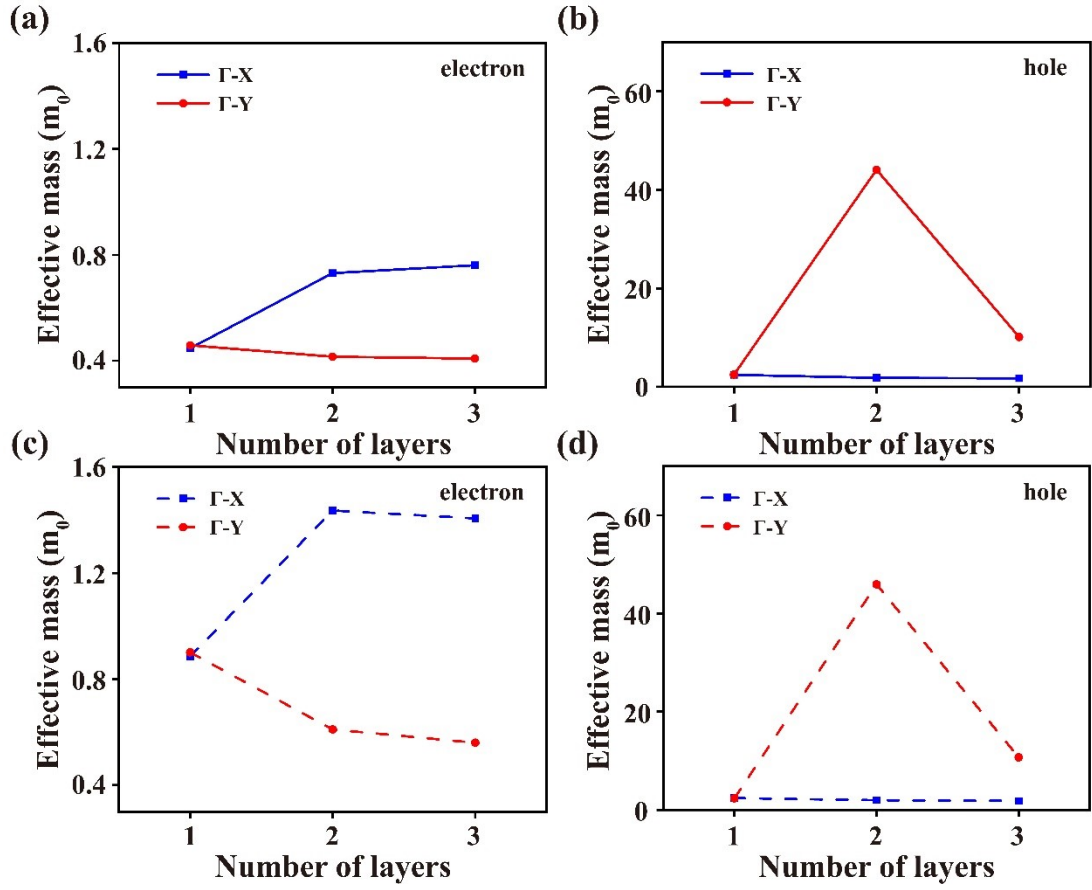

**FIG. S5.** Effective mass of (a, c) electrons and (b, d) holes along the  $\Gamma$ -X (blue) and  $\Gamma$ -Y (red) directions versus the number of layers. SOC is included for (c, d) with dashed lines.

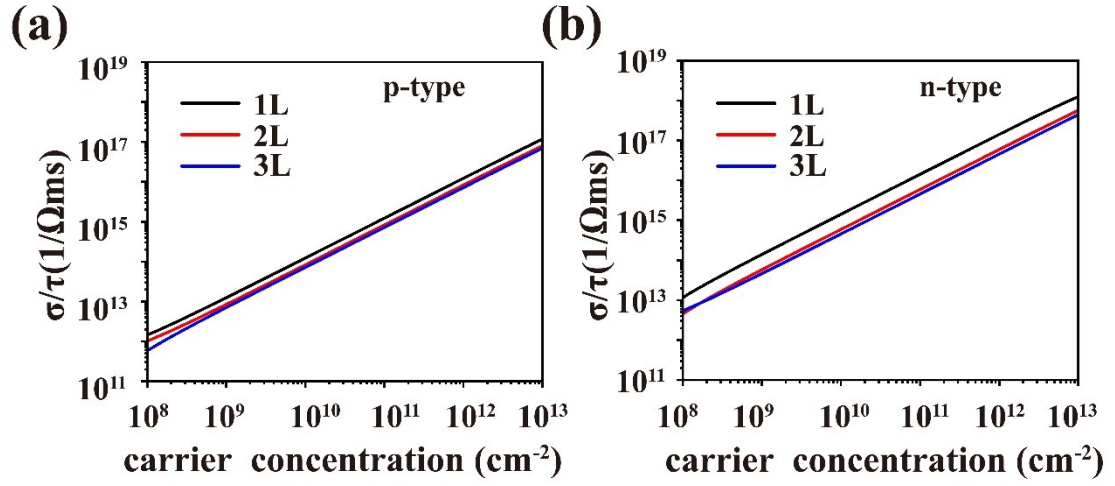

FIG. S6. The variation of (a-b)  $\sigma/\tau$  with different doping concentration at 300 K for 2D  $\text{Bi}_2\text{SeO}_5$ .

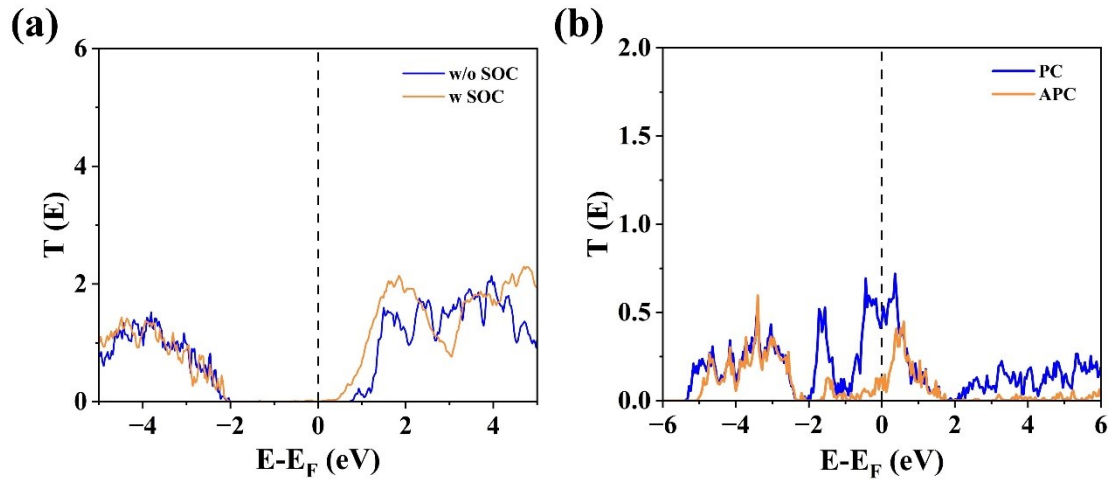

**FIG. S7.** (a) Transmission spectra of the Al/2L Bi<sub>2</sub>SeO<sub>5</sub>/Al device. (b) Transmission spectra of the FeS<sub>2</sub>/2L Bi<sub>2</sub>SeO<sub>5</sub>/FeS<sub>2</sub> MTJ.



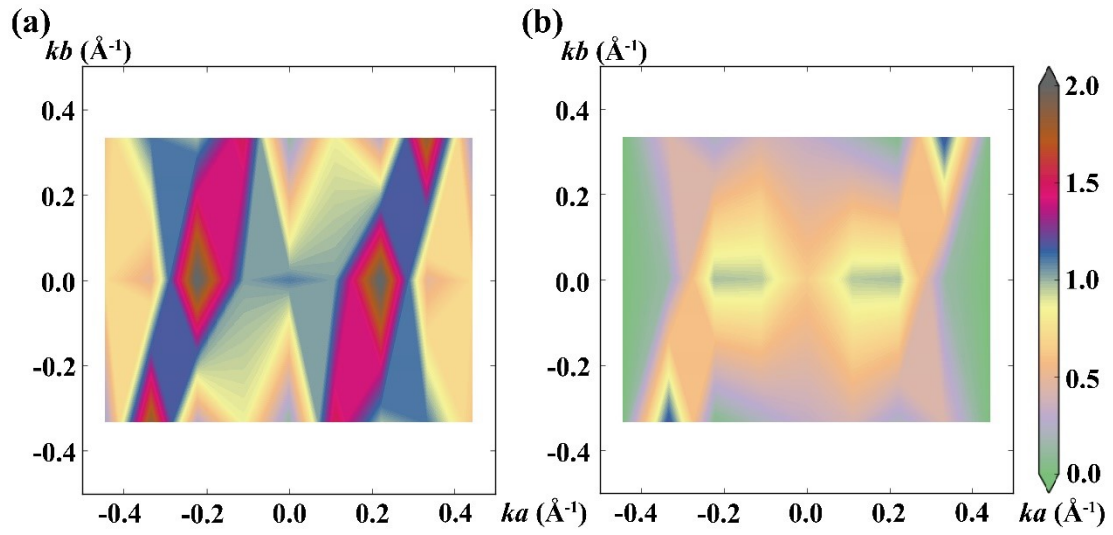

**FIG. S8.**  $k$ -resolved transmission coefficients for the  $\text{FeS}_2/1\text{L Bi}_2\text{SeO}_5/\text{FeS}_2$  MTJ for the (a) PC and (b) APC states.  $E = 0$  eV.

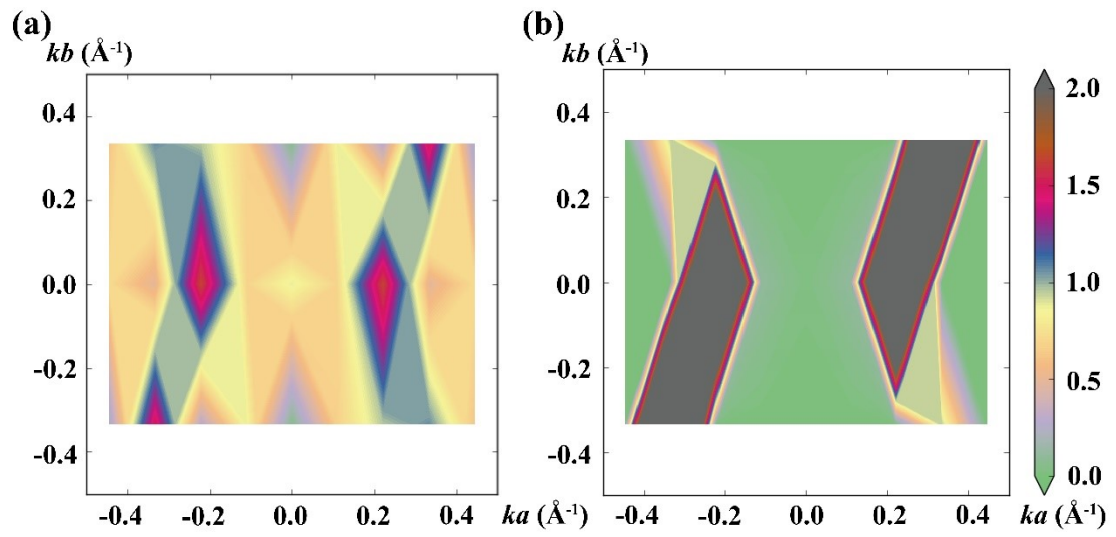

**FIG. S9.**  $k$ -resolved transmission coefficients for the  $\text{FeS}_2/2\text{L Bi}_2\text{SeO}_5/\text{FeS}_2$  MTJ for the (a) PC and (b) APC states.  $E = 0$  eV.

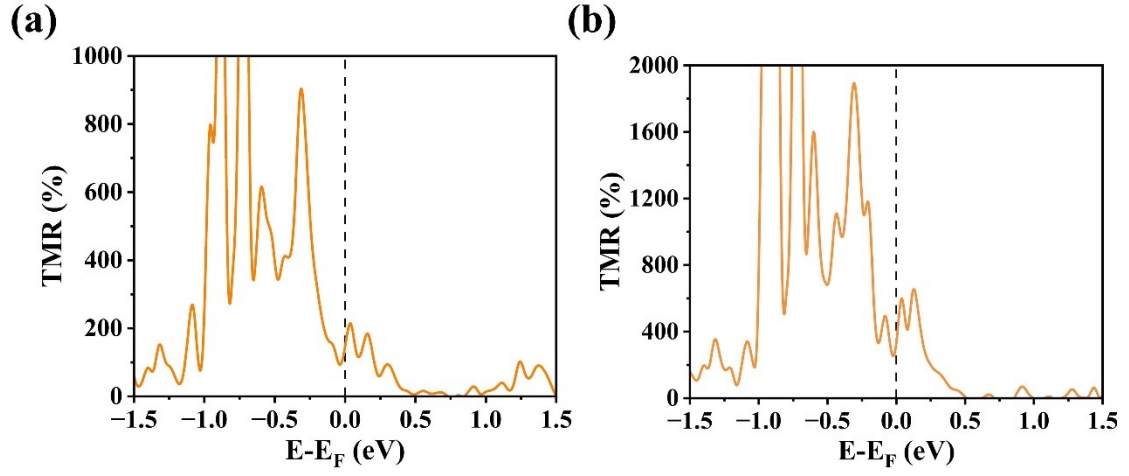

**FIG. S10.** TMR as a function of chemical potential ( $E$ ) for (a) FeS<sub>2</sub>/1L Bi<sub>2</sub>SeO<sub>5</sub>/FeS<sub>2</sub> and (b) FeS<sub>2</sub>/2L Bi<sub>2</sub>SeO<sub>5</sub>/FeS<sub>2</sub> MTJs.

**TABLE S1.** Lattice constants and volume of bulk  $\text{Bi}_2\text{SeO}_5$  calculated by using different

| System                      | a (Å) | b (Å) | c (Å) | V (Å <sup>3</sup> ) |
|-----------------------------|-------|-------|-------|---------------------|
| Exp. <sup>1</sup>           | 11.44 | 16.28 | 5.49  | 1022.48             |
| PBE <sup>2</sup>            | 11.64 | 16.68 | 5.57  | 1081.444            |
| LDA <sup>3</sup>            | 11.09 | 16.12 | 5.43  | 970.7254            |
| DFT-D2 <sup>4</sup>         | 11.41 | 16.47 | 5.52  | 1037.333            |
| DFT-D3 <sup>5</sup>         | 11.49 | 16.52 | 5.55  | 1053.472            |
| DFT-D3 <sup>6</sup>         | 11.37 | 16.41 | 5.52  | 1029.931            |
| DFT-D4 <sup>7</sup>         | 11.65 | 16.69 | 5.57  | 1083.022            |
| TS <sup>8</sup>             | 11.53 | 16.58 | 5.56  | 1062.891            |
| TS/HI <sup>9,10</sup>       | 11.42 | 16.47 | 5.53  | 1040.123            |
| MBD@rSC <sup>11,12</sup>    | 11.46 | 16.50 | 5.54  | 1047.559            |
| MBD@rSC/FI <sup>13,14</sup> | 11.64 | 16.68 | 5.57  | 1081.444            |
| dDsC <sup>15,16</sup>       | 11.38 | 16.43 | 5.52  | 1032.093            |
| DFT-ulg <sup>17</sup>       | 11.43 | 16.48 | 5.54  | 1043.55             |
| vdW-DF <sup>18</sup>        | 11.71 | 16.80 | 5.63  | 1107.579            |
| vdW-DF2 <sup>19</sup>       | 11.68 | 16.87 | 5.66  | 1115.255            |
| optPBE-vdW <sup>20</sup>    | 11.51 | 16.57 | 5.57  | 1062.314            |
| optB88-vdW <sup>20</sup>    | 11.37 | 16.44 | 5.54  | 1035.552            |
| optB86b-vdW <sup>21</sup>   | 11.33 | 16.37 | 5.52  | 1023.806            |
| rev-vdW-DF2 <sup>22</sup>   | 11.35 | 16.40 | 5.53  | 1029.354            |
| vdW-DF-cx <sup>23</sup>     | 11.28 | 16.31 | 5.50  | 1011.872            |
| rVV10 <sup>24</sup>         | 11.23 | 16.32 | 5.52  | 1011.67             |
| SCAN+rVV10 <sup>25</sup>    | 11.21 | 16.18 | 5.46  | 990.3228            |

computational methods.

**TABLE S2.** Relative differences between DFT and experimental results (unit: %).  $A_0$ ,  $b_0$ ,  $c_0$  and  $V_0$  are the lattice constants and volume measured in the experiment.

| System      | $(a - a_0)/a_0$ | $(b - b_0)/b_0$ | $(c - c_0)/c_0$ | $(V - V_0)/V_0$ |
|-------------|-----------------|-----------------|-----------------|-----------------|
| DFT-D3      | -0.61           | 0.80            | 0.55            | 0.73            |
| dDsC        | -0.52           | 0.92            | 0.55            | 0.94            |
| optB88-vdW  | -0.61           | 0.98            | 0.91            | 1.28            |
| optB86b-vdW | -0.96           | 0.55            | 0.55            | 0.13            |
| rev-vdW-DF2 | -0.79           | 0.74            | 0.73            | 0.67            |

## REFERENCES

- <sup>1</sup>C. Zhang, T. Tu, J. Wang, Y. Zhu, C. Tan, L. Chen, M. Wu, R. Zhu, Y. Liu, H. Fu, J. Yu, Y. Zhang, X. Cong, X. Zhou, J. Zhao, T. Li, Z. Liao, X. Wu, K. Lai, B. Yan, P. Gao, Q. Huang, H. Xu, H. Hu, H. Liu, J. Yin, and H. Peng, *Nat. Mater.* **22**, 832 (2023).
- <sup>2</sup>J. P. Perdew, K. Burke, and M. Ernzerhof, *Phys. Rev. Lett.* **77**, 3865 (1996).
- <sup>3</sup>P. A. M. Dirac, *Math. Proc. Cambridge Philos. Soc.* **26**, 376 (1930).
- <sup>4</sup>S. Grimme, *J Comput. Chem.* **27**, 1787 (2006).
- <sup>5</sup>S. Grimme, J. Antony, S. Ehrlich, and H. Krieg, *J. Chem. Phys.* **132**, 154104 (2010).
- <sup>6</sup>S. Grimme, S. Ehrlich, and L. Goerigk, *J Comput. Chem.* **32**, 1456 (2011).
- <sup>7</sup>E. Caldeweyher, S. Ehlert, A. Hansen, H. Neugebauer, S. Spicher, C. Bannwarth, and S. Grimme, *J. Chem. Phys.* **150**, 154112 (2019).
- <sup>8</sup>A. Tkatchenko and M. Scheffler, *Phys. Rev. Lett.* **102**, 073005 (2009).
- <sup>9</sup>T. Bučko, S. Lebègue, J. G. Ángyán, and J. Hafner, *J. Chem. Phys.* **141**, 034114 (2014).
- <sup>10</sup>T. Bučko, S. Lebègue, J. Hafner, and J. G. Ángyán, *J. Chem. Phys.* **9**, 4293 (2013).
- <sup>11</sup>A. Ambrosetti, A. M. Reilly, R. A. DiStasio, Jr., and A. Tkatchenko, *J. Chem. Phys.* **140**, 18A508 (2014).
- <sup>12</sup>A. Tkatchenko, R. A. DiStasio, R. Car, and M. Scheffler, *Phys. Rev. Lett.* **108**, 236402 (2012).
- <sup>13</sup>T. Gould and T. Bučko, *J. Chem. Phys.* **12**, 3603 (2016).
- <sup>14</sup>T. Gould, S. Lebègue, J. G. Ángyán, and T. Bučko, *J. Chem. Phys.* **12**, 5920 (2016).
- <sup>15</sup>S. N. Steinmann and C. Corminboeuf, *J. Chem. Phys.* **134**, 044117 (2011).
- <sup>16</sup>S. N. Steinmann and C. Corminboeuf, *J. Chem. Phys.* **7**, 3567 (2011).
- <sup>17</sup>H. Kim, J.-M. Choi, and W. A. Goddard, III, *J. Phys. Chem. Lett.* **3**, 360 (2012).
- <sup>18</sup>M. Dion, H. Rydberg, E. Schröder, D. C. Langreth, and B. I. Lundqvist, *Phys. Rev. Lett.* **92**, 246401 (2004).
- <sup>19</sup>K. Lee, É. D. Murray, L. Kong, B. I. Lundqvist, and D. C. Langreth, *Phys. Rev. B* **82**, 081101 (2010).
- <sup>20</sup>J. Klimeš, D. R. Bowler, and A. Michaelides, *Journal of Physics: Condensed Matter* **22**, 022201 (2010).
- <sup>21</sup>J. Klimeš, D. R. Bowler, and A. Michaelides, *Phys. Rev. B* **83**, 195131 (2011).
- <sup>22</sup>I. Hamada, *Phys. Rev. B* **89**, 121103 (2014).
- <sup>23</sup>K. Berland and P. Hyldgaard, *Phys. Rev. B* **89**, 035412 (2014).

<sup>24</sup>R. Sabatini, T. Gorni, and S. de Gironcoli, Phys. Rev. B **87**, 041108 (2013).

<sup>25</sup>H. Peng, Z.-H. Yang, J. P. Perdew, and J. Sun, Phys. Rev. X **6**, 041005 (2016).
